# Supplementary material for: Loss of NDR1/2 kinases impairs endomembrane trafficking and autophagy leading to neurodegeneration
Source: Life Sci Alliance. 2022 Nov 29;6(2):e202201712. doi: 10.26508/lsa.202201712 (PMC9711861; doi:10.26508/lsa.202201712)
Supplement: Supplementary file 7 [file LSA-2022-01712_TableS6.xlsx]

## Sheet: Analysis details
Gene list	Background
2010300C02Rik	Mus Musculus
2310035C23Rik
Add2
Akap10
Akt1s1
Amfr
Ank3
Ap1ar
Ap3b2
Arfgap1
Arhgap1
Astn1
Ate1
Atf7ip
Atp2b1
Bag6
Bcan
Bcas3
Birc6
Brsk2
Bsn
C2cd2l
C530008M17Rik
Cacna1a
Cacna1e
Cacng8
Cadps
Calm1
Camk2a
Camk2b
Cask
Caskin1
Cdk16
Clasp1
Clint1
Ctnna2
D630045J12Rik
Dnajc6
Dnal1
Dnm1
Dpysl2
Dync1li2
Edc3
Edc4
Efr3b
Eif4b
Eif4g3
Elfn2
Epb41l1
Epb41l3
Fam171a2
Farp1
Frmd4a
Fry
Gabra1
Gabra4
Gbf1
Gemin5
Git1
Git2
Gphn
Gpr158
Gprin1
Hecw2
Hepacam
Hspa4
Ildr2
Inpp5j
Iqsec2
Jakmip2
Kazn
Kcnj3
Kcnq2
FSA
Lactb2
PLPPR4
Lrrc7
Magi2
Map1a
Map1b
Map4
Mapre3
Mark2
Mcf2l
Mgrn1
Mink1
AFDN
Nav1
Ndel1
Necap1
Nisch
Nos1
Nptn
Nyap2
Ophn1
Osbp
Osbpl6
Oxr1
Pacsin1
Palm
Pcdh9
Pclo
Pdap1
Pde4b
Peak1
Pebp1
Pex14
Pi4kb
Pitpnm1
Ppp1r12c
Ppp1r16b
Ppp1r9b
Prickle1
Prickle2
Prrt3
Psip1
Ptprn2
Ptprs
PPR3
Rab11fip2
Rab11fip5
Rabgap1
Ralgapb
Raph1
Rasgrf1
Reps2
Rgs7
Rims1
Rplp0
Rtn1
Sars
Sec16a
Serbp1
Shank2
Sipa1l1
Slc12a5
Slc1a2
Slc24a2
Slc30a3
Slc4a3
Slc6a15
Smpd3
Snap91
Spag9
Sphkap
Sqstm1
Srrm2
Srsf4
Syn1
Synpo
Tnik
Tnks1bp1
Tpi1
Tppp
Trappc8
Ttc3
Ttc9
Usp31
Zdhhc5
Camk2d
Ppp1r12a
Ppp1r13b
Ppp1r1a
Psmd2
Srgap3
Rps6ka2
Aak1
Cdkl5
Clip1
Exoc7
Itsn1
Sptbn1
Usp5
Ank2
Baiap2

## Sheet: Phospho_GO_BP
Gene ontology - Biological Process
Category	Term	Count	%	PValue	Genes	List Total	Pop Hits	Pop Total	Fold Enrichment	Bonferroni	Benjamini	FDR
GOTERM_BP_DIRECT	GO:0001578~microtubule bundle formation	5	2.89017	8.84102e-05	CLIP1, MAP1B, NAV1, TPPP, CLASP1	161	27	18082	20.7983	0.0740363	0.075731	0.0743382
GOTERM_BP_DIRECT	GO:0046777~protein autophosphorylation	9	5.20231	0.000227769	CAMK2B, CAMK2D, CDKL5, PEAK1, CAMK2A, MINK1, AAK1, TNIK, MARK2	161	183	18082	5.52347	0.179779	0.075731	0.0743382
GOTERM_BP_DIRECT	GO:0006816~calcium ion transport	8	4.62428	0.000261141	CAMK2B, SLC24A2, CACNG8, CAMK2D, CAMK2A, CACNA1A, ATP2B1, CACNA1E	161	141	18082	6.37223	0.203257	0.075731	0.0743382
GOTERM_BP_DIRECT	GO:0090630~activation of GTPase activity	6	3.46821	0.000471295	BCAS3, RALGAPB, RABGAP1, SIPA1L1, RASGRF1, NDEL1	161	73	18082	9.231	0.336432	0.0807565	0.0792713
GOTERM_BP_DIRECT	GO:0007399~nervous system development	12	6.93642	0.000543738	CAMK2B, BRSK2, OPHN1, DPYSL2, MAP1B, MAGI2, NPTN, SLC1A2, NAV1, TNIK, NDEL1, PPP1R9B	161	377	18082	3.57487	0.376983	0.0807565	0.0792713
GOTERM_BP_DIRECT	GO:0048813~dendrite morphogenesis	5	2.89017	0.000556941	FARP1, CAMK2A, MINK1, CACNA1A, CTNNA2	161	43	18082	13.0594	0.384102	0.0807565	0.0792713
GOTERM_BP_DIRECT	GO:0007416~synapse assembly	5	2.89017	0.000663245	FARP1, PCLO, CACNA1A, BSN, SHANK2	161	45	18082	12.479	0.43854	0.0824319	0.0809159
GOTERM_BP_DIRECT	GO:0060291~long-term synaptic potentiation	5	2.89017	0.000917657	CAMK2B, SLC24A2, RIMS1, NPTN, SHANK2	161	49	18082	11.4603	0.550099	0.0894496	0.0878046
GOTERM_BP_DIRECT	GO:0019226~transmission of nerve impulse	4	2.31214	0.000925341	CACNG8, KCNQ2, CACNA1A, CACNA1E	161	22	18082	20.4201	0.5531	0.0894496	0.0878046
GOTERM_BP_DIRECT	GO:2000369~regulation of clathrin-mediated endocytosis	3	1.7341	0.00114025	DNAJC6, AAK1, SNAP91	161	6	18082	56.1553	0.629382	0.0914138	0.0897326
GOTERM_BP_DIRECT	GO:0006897~endocytosis	8	4.62428	0.00115581	NECAP1, OPHN1, DPYSL2, ITSN1, AAK1, CLINT1, DNM1, PACSIN1	161	181	18082	4.964	0.63437	0.0914138	0.0897326
GOTERM_BP_DIRECT	GO:0006810~transport	30	17.341	0.00128473	SLC1A2, CACNA1A, SLC4A3, CACNA1E, BAG6, RIMS1, CACNG8, OSBP, RAB11FIP2, KCNJ3, RAB11FIP5, NDEL1, GABRA1, OSBPL6, SLC12A5, SLC30A3, EXOC7, SLC6A15, GABRA4, CADPS, ATP2B1, AP3B2, ARFGAP1, SNAP91, PEX14, DYNC1LI2, CLIP1, NECAP1, PITPNM1, KCNQ2	161	1822	18082	1.84924	0.673208	0.0931429	0.0914299
GOTERM_BP_DIRECT	GO:0031175~neuron projection development	7	4.04624	0.00149153	GPRIN1, RASGRF1, PRICKLE2, MAP4, FRY, NDEL1, CDK16	161	139	18082	5.65593	0.727087	0.0945371	0.0927985
GOTERM_BP_DIRECT	GO:0072661~protein targeting to plasma membrane	4	2.31214	0.00152229	PALM, ANK2, ANK3, SPTBN1	161	26	18082	17.2785	0.734303	0.0945371	0.0927985
GOTERM_BP_DIRECT	GO:0000226~microtubule cytoskeleton organization	6	3.46821	0.00162995	DYNC1LI2, MAP1B, MAP1A, MARK2, CLASP1, NDEL1	161	96	18082	7.01941	0.758096	0.0945371	0.0927985
GOTERM_BP_DIRECT	GO:0007269~neurotransmitter secretion	4	2.31214	0.00189341	RIMS1, PTPRN2, SYN1, SNAP91	161	28	18082	16.0444	0.807725	0.0979767	0.0961748
GOTERM_BP_DIRECT	GO:0043547~positive regulation of GTPase activity	7	4.04624	0.00191449	BCAS3, AFDN, CDKL5, RABGAP1, RASGRF1, NDEL1, RGS7	161	146	18082	5.38475	0.811225	0.0979767	0.0961748
GOTERM_BP_DIRECT	GO:0035773~insulin secretion involved in cellular response to glucose stimulus	3	1.7341	0.00210381	PTPRN2, RAB11FIP2, RAB11FIP5	161	8	18082	42.1165	0.839946	0.100823	0.0989691
GOTERM_BP_DIRECT	GO:0072659~protein localization to plasma membrane	5	2.89017	0.00221062	EPB41L3, ANK2, TNIK, ANK3, GPR158	161	62	18082	9.0573	0.854178	0.100823	0.0989691
GOTERM_BP_DIRECT	GO:0007010~cytoskeleton organization	6	3.46821	0.00231778	PCLO, DPYSL2, PALM, EPB41L3, TNIK, PACSIN1	161	104	18082	6.47946	0.867186	0.100823	0.0989691
GOTERM_BP_DIRECT	GO:0007409~axonogenesis	6	3.46821	0.00262332	BRSK2, MAP1B, PLPPR4, CTNNA2, ANK3, SNAP91	161	107	18082	6.29779	0.898255	0.10868	0.106682
GOTERM_BP_DIRECT	GO:0051932~synaptic transmission, GABAergic	3	1.7341	0.00484502	GABRA1, CACNA1A, DNM1	161	12	18082	28.0776	0.985381	0.191572	0.188049
GOTERM_BP_DIRECT	GO:0006468~protein phosphorylation	13	7.51445	0.00523858	CAMK2B, CAMK2D, BRSK2, CDKL5, CAMK2A, MINK1, CASK, PEAK1, RPS6KA2, AAK1, TNIK, MARK2, CDK16	161	576	18082	2.53479	0.989637	0.191572	0.188049
GOTERM_BP_DIRECT	GO:0030010~establishment of cell polarity	4	2.31214	0.00528475	BRSK2, PRICKLE2, RAB11FIP2, MARK2	161	40	18082	11.2311	0.990047	0.191572	0.188049
GOTERM_BP_DIRECT	GO:0006811~ion transport	13	7.51445	0.00582933	GABRA1, SLC12A5, SLC30A3, SLC6A15, GABRA4, CACNA1A, ATP2B1, SLC4A3, CACNA1E, ADD2, CACNG8, KCNQ2, KCNJ3	161	584	18082	2.50006	0.99382	0.202861	0.19913
GOTERM_BP_DIRECT	GO:0098609~cell-cell adhesion	7	4.04624	0.00679167	EPB41L1, SERBP1, ARHGAP1, TNKS1BP1, CTNNA2, CLINT1, MARK2	161	189	18082	4.15965	0.997339	0.22726	0.22308
GOTERM_BP_DIRECT	GO:0070588~calcium ion transmembrane transport	5	2.89017	0.00774345	SLC24A2, CACNG8, CACNA1A, ATP2B1, CACNA1E	161	88	18082	6.38128	0.998844	0.249511	0.244922
GOTERM_BP_DIRECT	GO:0016310~phosphorylation	13	7.51445	0.00832583	CAMK2B, CAMK2D, BRSK2, CDKL5, CAMK2A, MINK1, CASK, PEAK1, RPS6KA2, PI4KB, TNIK, MARK2, CDK16	161	612	18082	2.38568	0.999307	0.258217	0.253469
GOTERM_BP_DIRECT	GO:0007009~plasma membrane organization	3	1.7341	0.00860725	ANK3, BAIAP2, SPTBN1	161	16	18082	21.0582	0.999458	0.258217	0.253469
GOTERM_BP_DIRECT	GO:0035556~intracellular signal transduction	10	5.78035	0.00936296	BRSK2, PPP1R1A, RPS6KA2, MCF2L, MINK1, RASGRF1, ITSN1, TNIK, MARK2, RGS7	161	400	18082	2.80776	0.999721	0.271526	0.266532
GOTERM_BP_DIRECT	GO:0031532~actin cytoskeleton reorganization	4	2.31214	0.0109446	BRSK2, SIPA1L1, MINK1, TNIK	161	52	18082	8.63927	0.999931	0.307154	0.301505
GOTERM_BP_DIRECT	GO:0006511~ubiquitin-dependent protein catabolic process	6	3.46821	0.0119482	BAG6, USP5, USP31, AMFR, TTC3, SQSTM1	161	154	18082	4.37574	0.999971	0.324843	0.318869
GOTERM_BP_DIRECT	GO:0009408~response to heat	4	2.31214	0.0140343	HSPA4, PSIP1, PEBP1, NOS1	161	57	18082	7.88144	0.999995	0.362102	0.355443
GOTERM_BP_DIRECT	GO:0006887~exocytosis	5	2.89017	0.0141511	RIMS1, BRSK2, EXOC7, CADPS, CDK16	161	105	18082	5.34812	0.999996	0.362102	0.355443
GOTERM_BP_DIRECT	GO:0048266~behavioral response to pain	3	1.7341	0.0146338	GIT2, CACNA1A, CACNA1E	161	21	18082	16.0444	0.999997	0.363754	0.357064
GOTERM_BP_DIRECT	GO:0061178~regulation of insulin secretion involved in cellular response to glucose stimulus	3	1.7341	0.0174282	BRSK2, CACNA1E, CDK16	161	23	18082	14.6492	1	0.391571	0.38437
GOTERM_BP_DIRECT	GO:0070509~calcium ion import	3	1.7341	0.0174282	CASK, CACNA1A, CACNA1E	161	23	18082	14.6492	1	0.391571	0.38437
GOTERM_BP_DIRECT	GO:0071709~membrane assembly	2	1.15607	0.0176193	ANK3, SPTBN1	161	2	18082	112.311	1	0.391571	0.38437
GOTERM_BP_DIRECT	GO:0061162~establishment of monopolar cell polarity	2	1.15607	0.0176193	MAP1B, GBF1	161	2	18082	112.311	1	0.391571	0.38437
GOTERM_BP_DIRECT	GO:0048812~neuron projection morphogenesis	4	2.31214	0.0183315	BRSK2, EPB41L3, NYAP2, PACSIN1	161	63	18082	7.13083	1	0.391571	0.38437
GOTERM_BP_DIRECT	GO:0007026~negative regulation of microtubule depolymerization	3	1.7341	0.0189034	MAP1B, MAP1A, CLASP1	161	24	18082	14.0388	1	0.391571	0.38437
GOTERM_BP_DIRECT	GO:0032465~regulation of cytokinesis	3	1.7341	0.0189034	BIRC6, CALM1, GIT1	161	24	18082	14.0388	1	0.391571	0.38437
GOTERM_BP_DIRECT	GO:0007214~gamma-aminobutyric acid signaling pathway	3	1.7341	0.0204293	GABRA1, GABRA4, CACNA1A	161	25	18082	13.4773	1	0.409772	0.402236
GOTERM_BP_DIRECT	GO:0007612~learning	4	2.31214	0.0207241	SLC24A2, SLC12A5, SHANK2, PPP1R9B	161	66	18082	6.8067	1	0.409772	0.402236
GOTERM_BP_DIRECT	GO:0001764~neuron migration	5	2.89017	0.0244431	CDKL5, NAV1, MARK2, NDEL1, ASTN1	161	124	18082	4.52865	1	0.468341	0.459728
GOTERM_BP_DIRECT	GO:0050770~regulation of axonogenesis	3	1.7341	0.0253012	SIPA1L1, CACNA1A, MARK2	161	28	18082	12.0333	1	0.468341	0.459728
GOTERM_BP_DIRECT	GO:0030100~regulation of endocytosis	3	1.7341	0.0253012	OPHN1, ARFGAP1, SNAP91	161	28	18082	12.0333	1	0.468341	0.459728
GOTERM_BP_DIRECT	GO:0021766~hippocampus development	4	2.31214	0.0269423	BCAN, PTPRS, PEBP1, PPP1R9B	161	73	18082	6.154	1	0.48833	0.479349
GOTERM_BP_DIRECT	GO:0018105~peptidyl-serine phosphorylation	5	2.89017	0.0305615	CAMK2B, CAMK2D, BRSK2, RPS6KA2, CAMK2A	161	133	18082	4.2222	1	0.537559	0.527673
GOTERM_BP_DIRECT	GO:0035023~regulation of Rho protein signal transduction	4	2.31214	0.0308942	FARP1, MCF2L, RASGRF1, ITSN1	161	77	18082	5.83431	1	0.537559	0.527673
GOTERM_BP_DIRECT	GO:0034765~regulation of ion transmembrane transport	5	2.89017	0.032033	CACNG8, KCNQ2, CACNA1A, CACNA1E, KCNJ3	161	135	18082	4.15965	1	0.546446	0.536396
GOTERM_BP_DIRECT	GO:0010976~positive regulation of neuron projection development	5	2.89017	0.0343221	CAMK2B, LRRC7, MAGI2, NPTN, MARK2	161	138	18082	4.06922	1	0.573382	0.562837
GOTERM_BP_DIRECT	GO:1903829~positive regulation of cellular protein localization	2	1.15607	0.0349302	NPTN, PPP1R9B	161	4	18082	56.1553	1	0.573382	0.562837
GOTERM_BP_DIRECT	GO:0001975~response to amphetamine	3	1.7341	0.0362822	DPYSL2, CALM1, PPP1R9B	161	34	18082	9.90976	1	0.584546	0.573796
GOTERM_BP_DIRECT	GO:0002027~regulation of heart rate	3	1.7341	0.0402822	ANK2, CALM1, CACNA1E	161	36	18082	9.35921	1	0.625812	0.614303
GOTERM_BP_DIRECT	GO:0016358~dendrite development	3	1.7341	0.0402822	MAP1B, BAIAP2, PPP1R9B	161	36	18082	9.35921	1	0.625812	0.614303
GOTERM_BP_DIRECT	GO:0016192~vesicle-mediated transport	6	3.46821	0.0411112	SPAG9, BCAS3, GBF1, CLINT1, AP3B2, ARFGAP1	161	213	18082	3.16368	1	0.627486	0.615946
GOTERM_BP_DIRECT	GO:0051294~establishment of spindle orientation	2	1.15607	0.0434715	MAP4, CLASP1	161	5	18082	44.9242	1	0.652073	0.640081
GOTERM_BP_DIRECT	GO:0045773~positive regulation of axon extension	3	1.7341	0.0487497	CDKL5, MAP1B, NDEL1	161	40	18082	8.42329	1	0.718852	0.705632
GOTERM_BP_DIRECT	GO:0030865~cortical cytoskeleton organization	2	1.15607	0.0519378	EPB41L3, SYNPO	161	6	18082	37.4369	1	0.746573	0.732843
GOTERM_BP_DIRECT	GO:0048167~regulation of synaptic plasticity	3	1.7341	0.053204	SIPA1L1, RASGRF1, BAIAP2	161	42	18082	8.02218	1	0.746573	0.732843
GOTERM_BP_DIRECT	GO:1902476~chloride transmembrane transport	3	1.7341	0.053204	GABRA1, SLC12A5, SLC4A3	161	42	18082	8.02218	1	0.746573	0.732843
GOTERM_BP_DIRECT	GO:0048013~ephrin receptor signaling pathway	3	1.7341	0.0554835	SIPA1L1, ITSN1, GIT1	161	43	18082	7.83562	1	0.766201	0.75211
GOTERM_BP_DIRECT	GO:1901841~regulation of high voltage-gated calcium channel activity	2	1.15607	0.0603296	PDE4B, CALM1	161	7	18082	32.0887	1	0.807488	0.792638
GOTERM_BP_DIRECT	GO:0007016~cytoskeletal anchoring at plasma membrane	2	1.15607	0.0603296	EPB41L1, EPB41L3	161	7	18082	32.0887	1	0.807488	0.792638
GOTERM_BP_DIRECT	GO:1903078~positive regulation of protein localization to plasma membrane	2	1.15607	0.0768923	RAB11FIP2, SPTBN1	161	9	18082	24.9579	1	0.98377	0.965677
GOTERM_BP_DIRECT	GO:2000008~regulation of protein localization to cell surface	2	1.15607	0.0768923	GBF1, RAB11FIP5	161	9	18082	24.9579	1	0.98377	0.965677
GOTERM_BP_DIRECT	GO:0030644~cellular chloride ion homeostasis	2	1.15607	0.0768923	SLC12A5, CACNA1A	161	9	18082	24.9579	1	0.98377	0.965677
GOTERM_BP_DIRECT	GO:0015031~protein transport	10	5.78035	0.0804252	NECAP1, PITPNM1, EXOC7, CADPS, RAB11FIP2, AP3B2, PEX14, ARFGAP1, SNAP91, RAB11FIP5	161	592	18082	1.89714	1	1	0.982739
GOTERM_BP_DIRECT	GO:0090557~establishment of endothelial intestinal barrier	2	1.15607	0.0850646	AFDN, PTPRS	161	10	18082	22.4621	1	1	0.982739
GOTERM_BP_DIRECT	GO:0034613~cellular protein localization	3	1.7341	0.0852638	HEPACAM, AP1AR, ANK2	161	55	18082	6.12603	1	1	0.982739
GOTERM_BP_DIRECT	GO:0030154~cell differentiation	12	6.93642	0.0861264	CAMK2B, BAG6, RIMS1, DPYSL2, ILDR2, NAV1, CTNNA2, SQSTM1, MARK2, NDEL1, PPP1R9B, CDK16	161	780	18082	1.72785	1	1	0.982739
GOTERM_BP_DIRECT	GO:0071872~cellular response to epinephrine stimulus	2	1.15607	0.093165	PDE4B, NOS1	161	11	18082	20.4201	1	1	0.982739
GOTERM_BP_DIRECT	GO:0090502~RNA phosphodiester bond hydrolysis, endonucleolytic	2	1.15607	0.093165	LACTB2, EDC3	161	11	18082	20.4201	1	1	0.982739

## Sheet: Phospho_GO_CC
Gene ontology - Cellular Compartment
Category	Term	Count	%	PValue	Genes	List Total	Pop Hits	Pop Total	Fold Enrichment	Bonferroni	Benjamini	FDR
GOTERM_CC_DIRECT	GO:0014069~postsynaptic density	31	17.9191	1.38653e-26	CAMK2B, CAMK2A, PPP1R9B, ADD2, RIMS1, CACNG8, SIPA1L1, PCLO, EPB41L1, PALM, EPB41L3, PDE4B, NPTN, NOS1, MAP4, CTNNA2, SYNPO, BSN, SPTBN1, MAGI2, MINK1, ANK2, BAIAP2, ARFGAP1, SNAP91, SYN1, LRRC7, DNAJC6, MAP1B, MAP1A, SHANK2	168	239	19662	15.1804	3.85455e-24	3.85455e-24	3.36927e-24
GOTERM_CC_DIRECT	GO:0045202~synapse	36	20.8092	3.53005e-22	CAMK2A, ITSN1, SLC1A2, GPHN, PPP1R9B, RIMS1, CACNG8, SIPA1L1, PCLO, OPHN1, NOS1, SYNPO, BSN, GIT1, PACSIN1, FARP1, GABRA1, PTPRN2, SLC30A3, GABRA4, MAGI2, MINK1, CADPS, CASK, ANK2, ATP2B1, ANK3, ARFGAP1, SYN1, DNM1, BCAN, LRRC7, DNAJC6, MAP1B, SHANK2, CDK16	168	505	19662	8.34314	9.81355e-20	4.90677e-20	4.28901e-20
GOTERM_CC_DIRECT	GO:0005737~cytoplasm	110	63.5838	4.96222e-17	ZDHHC5, PEBP1, FRY, EDC3, EDC4, OPHN1, DPYSL2, RPS6KA2, OSBP, PALM, SYNPO, BSN, RGS7, CDKL5, SLC30A3, MAGI2, SARS, CASK, KAZN, ANK2, FRMD4A, ANK3, NISCH, CLIP1, DYNC1LI2, MAP1B, HECW2, MAP1A, GEMIN5, TNIK, SQSTM1, BRSK2, HEPACAM, CACNA1A, BAG6, EPB41L1, CASKIN1, EPB41L3, INPP5J, MAP4, SRGAP3, TPPP, SPTBN1, MARK2, RAB11FIP5, PACSIN1, PTPRN2, OSBPL6, SPHKAP, IQSEC2, HSPA4, SEC16A, AFDN, PPP1R1A, AA…	168	6631	19662	1.94148	1.3795e-14	4.59832e-15	4.0194e-15
GOTERM_CC_DIRECT	GO:0030054~cell junction	34	19.6532	1.52343e-15	CAMK2A, ITSN1, GPHN, PPP1R9B, RIMS1, CACNG8, SIPA1L1, PCLO, OPHN1, OSBP, EPB41L3, CTNNA2, SYNPO, BSN, PACSIN1, FARP1, GABRA1, PTPRN2, SLC30A3, GABRA4, MAGI2, MINK1, CADPS, KAZN, ANK2, ATP2B1, ANK3, SYN1, AFDN, PEAK1, LRRC7, MAP1B, SHANK2, CDK16	168	718	19662	5.54208	4.32099e-13	1.05878e-13	9.25484e-14
GOTERM_CC_DIRECT	GO:0005856~cytoskeleton	39	22.5434	1.08267e-13	CAMK2B, BRSK2, RABGAP1, FRY, GPHN, PPP1R9B, ADD2, SIPA1L1, EPB41L1, DPYSL2, EPB41L3, TNKS1BP1, NOS1, MAP4, CTNNA2, TPPP, SYNPO, BSN, SPTBN1, MARK2, CLASP1, NDEL1, BCAS3, FARP1, KAZN, NAV1, FRMD4A, ANK2, ANK3, BAIAP2, DNM1, DYNC1LI2, CLIP1, PEAK1, MAP1B, MAP1A, BIRC6, MAPRE3, TNIK	168	1113	19662	4.10098	3.00926e-11	6.01967e-12	5.26179e-12
GOTERM_CC_DIRECT	GO:0030425~dendrite	24	13.8728	3.0002e-11	CAMK2B, FARP1, AMFR, CAMK2A, MAGI2, MINK1, RPLP0, ZDHHC5, CASK, CACNA1A, ANK3, SYN1, GPHN, PPP1R9B, BCAN, PCLO, OPHN1, DPYSL2, MAP1B, NPTN, NOS1, BSN, SYNPO, EIF4B	168	490	19662	5.73236	8.34056e-09	1.39009e-09	1.21508e-09
GOTERM_CC_DIRECT	GO:0043005~neuron projection	20	11.5607	3.26084e-09	FARP1, SLC30A3, MAGI2, ITSN1, SLC1A2, PEBP1, ANK3, BAIAP2, PPP1R9B, PCLO, SIPA1L1, LRRC7, DPYSL2, MAP4, CALM1, BSN, GIT1, SHANK2, PACSIN1, CDK16	168	420	19662	5.57313	9.06512e-07	1.29502e-07	1.13198e-07
GOTERM_CC_DIRECT	GO:0043197~dendritic spine	13	7.51445	5.09383e-09	FARP1, SLC1A2, BAIAP2, PPP1R9B, SIPA1L1, OPHN1, LRRC7, MAP1B, PALM, PDE4B, NOS1, SYNPO, SHANK2	168	148	19662	10.2802	1.41608e-06	1.77011e-07	1.54725e-07
GOTERM_CC_DIRECT	GO:0016020~membrane	95	54.9133	3.51954e-08	PTPRS, ITSN1, RPLP0, ZDHHC5, ELFN2, SLC4A3, CLINT1, GPHN, EDC3, PPP1R9B, EDC4, SMPD3, RIMS1, AKAP10, SIPA1L1, PSMD2, DPYSL2, MCF2L, OSBP, PALM, PDE4B, NPTN, NOS1, SYNPO, GIT1, RGS7, PPP1R16B, SLC30A3, EXOC7, SLC6A15, MAGI2, MINK1, CASK, ANK2, ANK3, AP3B2, NISCH, DYNC1LI2, CLIP1, PITPNM1, LRRC7, GPRIN1, KCNQ2, GEMIN5, BIRC6, SHANK2, ASTN1, CAMK2B, SLC24A2, CAMK2D, D630045J12RIK, RTN1, MGRN1, HEPAC…	168	6998	19662	1.5888	9.78428e-06	1.08715e-06	9.50276e-07
GOTERM_CC_DIRECT	GO:0030426~growth cone	11	6.35838	1.07225e-06	PCLO, PCDH9, GPRIN1, DPYSL2, AMFR, MAP1B, RASGRF1, INPP5J, CALM1, SHANK2, PPP1R9B	168	159	19662	8.09681	0.000298042	2.98086e-05	2.60557e-05
GOTERM_CC_DIRECT	GO:0045211~postsynaptic membrane	12	6.93642	3.20368e-06	GABRA1, CACNG8, SIPA1L1, LRRC7, GABRA4, MINK1, ANK2, ANK3, SYNPO, SHANK2, GPHN, SNAP91	168	222	19662	6.32625	0.000890229	8.07445e-05	7.05788e-05
GOTERM_CC_DIRECT	GO:0030424~axon	15	8.67052	3.48537e-06	HEPACAM, CAMK2A, MINK1, SLC1A2, ANK3, AP3B2, SYN1, PCLO, DPYSL2, MAP1B, PALM, CTNNA2, BSN, SYNPO, NDEL1	168	370	19662	4.74469	0.000968466	8.07445e-05	7.05788e-05
GOTERM_CC_DIRECT	GO:0043195~terminal bouton	9	5.20231	5.49755e-06	PCLO, PTPRN2, OPHN1, DPYSL2, ITSN1, AAK1, SYN1, SNAP91, PACSIN1	168	113	19662	9.32143	0.00152716	0.000114082	9.97192e-05
GOTERM_CC_DIRECT	GO:0005829~cytosol	35	20.2312	5.74514e-06	CAMK2B, CAMK2D, RABGAP1, RASGRF1, ITSN1, PRICKLE1, BAG6, DPYSL2, OSBP, PDE4B, NOS1, GIT1, RGS7, PACSIN1, SPAG9, FARP1, OSBPL6, TPI1, HSPA4, EXOC7, SEC16A, GBF1, CASK, AP1AR, BAIAP2, EFR3B, SYN1, NISCH, RALGAPB, MAP1B, AKT1S1, MAP1A, GEMIN5, PI4KB, CALM1	168	1784	19662	2.2961	0.00159588	0.000114082	9.97192e-05
GOTERM_CC_DIRECT	GO:0005886~plasma membrane	68	39.3064	8.48872e-06	PPP1R13B, ITSN1, ARHGAP1, ZDHHC5, SLC4A3, GPHN, PPP1R9B, SMPD3, RIMS1, AKAP10, SIPA1L1, MCF2L, PALM, NPTN, TNKS1BP1, NOS1, SYNPO, RGS7, PPP1R16B, SLC30A3, EXOC7, MAGI2, MINK1, CASK, ANK2, ANK3, DNM1, NISCH, PEAK1, LRRC7, GPRIN1, MAP1B, KCNQ2, SHANK2, ASTN1, CAMK2D, MGRN1, CAMK2A, SLC1A2, CACNA1A, ADD2, CACNG8, EPB41L1, EPB41L3, INPP5J, MAP4, CTNNA2, RAB11FIP2, SPTBN1, MARK2, GPR158, PACSIN1, FARP…	168	4874	19662	1.63283	0.00235709	0.000157324	0.000137517
GOTERM_CC_DIRECT	GO:0042995~cell projection	20	11.5607	1.04457e-05	PPP1R16B, FARP1, SLC12A5, MINK1, ITSN1, CACNA1A, ANK3, BAIAP2, GPHN, PPP1R9B, CLIP1, OPHN1, GPRIN1, MAP1B, PALM, CTNNA2, NOS1, SYNPO, SHANK2, PACSIN1	168	712	19662	3.28752	0.0028997	0.000181494	0.000158644
GOTERM_CC_DIRECT	GO:0043025~neuronal cell body	17	9.82659	1.33729e-05	CAMK2D, SLC12A5, AMFR, CAMK2A, RASGRF1, PEBP1, CACNA1A, BAIAP2, GPHN, PPP1R9B, PCLO, SIPA1L1, DPYSL2, MAP1B, BSN, SHANK2, EIF4B	168	534	19662	3.72586	0.0037108	0.000218687	0.000191154
GOTERM_CC_DIRECT	GO:0048471~perinuclear region of cytoplasm	19	10.9827	2.54026e-05	SPAG9, PPP1R16B, CAMK2D, BRSK2, PPP1R13B, AMFR, MAGI2, ARHGAP1, ANK2, CLINT1, PCLO, MAP1B, OSBP, SERBP1, PDE4B, NOS1, TNIK, TPPP, PACSIN1	168	692	19662	3.21341	0.00703714	0.000392329	0.000342935
GOTERM_CC_DIRECT	GO:0031252~cell leading edge	6	3.46821	0.000112056	BCAS3, GBF1, ARHGAP1, RAPH1, AAK1, NDEL1	168	56	19662	12.5395	0.0306731	0.00153286	0.00133988
GOTERM_CC_DIRECT	GO:0005874~microtubule	12	6.93642	0.000114691	DYNC1LI2, CLIP1, DPYSL2, MAP1B, MAP1A, NAV1, MAPRE3, TPPP, MAP4, CLASP1, DNM1, NDEL1	168	327	19662	4.29489	0.031383	0.00153286	0.00133988
GOTERM_CC_DIRECT	GO:0048786~presynaptic active zone	5	2.89017	0.000115792	RIMS1, PCLO, BSN, SHANK2, SYN1	168	30	19662	19.506	0.0316793	0.00153286	0.00133988
GOTERM_CC_DIRECT	GO:0043194~axon initial segment	4	2.31214	0.000161676	CAMK2D, LRRC7, KCNQ2, ANK3	168	13	19662	36.011	0.0439544	0.002043	0.00178579
GOTERM_CC_DIRECT	GO:0005815~microtubule organizing center	8	4.62428	0.000364848	CAMK2B, SPAG9, RABGAP1, EXOC7, BIRC6, FRY, NDEL1, RAB11FIP5	168	155	19662	6.04055	0.0964703	0.0044099	0.0038547
GOTERM_CC_DIRECT	GO:0042734~presynaptic membrane	6	3.46821	0.000444747	RIMS1, CAMK2A, NPTN, SLC1A2, CASK, SNAP91	168	75	19662	9.36286	0.116326	0.00515165	0.00450306
GOTERM_CC_DIRECT	GO:0030018~Z disc	7	4.04624	0.000670809	PPP1R12A, SPHKAP, PDE4B, ANK2, ANK3, NOS1, SYNPO	168	124	19662	6.60685	0.170181	0.0074594	0.00652026
GOTERM_CC_DIRECT	GO:0060077~inhibitory synapse	4	2.31214	0.00071522	PCLO, NPTN, BSN, GPHN	168	21	19662	22.2925	0.18037	0.00751273	0.00656688
GOTERM_CC_DIRECT	GO:0008021~synaptic vesicle	7	4.04624	0.000729653	PDE4B, PEBP1, SYN1, DNM1, SNAP91, NDEL1, CDK16	168	126	19662	6.50198	0.183655	0.00751273	0.00656688
GOTERM_CC_DIRECT	GO:0019898~extrinsic component of membrane	6	3.46821	0.00078963	FARP1, EPB41L1, MCF2L, EPB41L3, INPP5J, BSN	168	85	19662	8.26134	0.197163	0.00783989	0.00685286
GOTERM_CC_DIRECT	GO:0043234~protein complex	15	8.67052	0.000964149	CAMK2D, AMFR, MAGI2, CASK, CACNA1A, PEX14, DNM1, SIPA1L1, EPB41L1, DPYSL2, AKT1S1, KCNQ2, NOS1, SPTBN1, RGS7	168	628	19662	2.79544	0.235217	0.00924253	0.0080789
GOTERM_CC_DIRECT	GO:0030315~T-tubule	5	2.89017	0.00139689	CAMK2D, ANK2, ANK3, NOS1, KCNJ3	168	57	19662	10.2663	0.321999	0.0129445	0.0113148
GOTERM_CC_DIRECT	GO:0005875~microtubule associated complex	4	2.31214	0.00151527	MAP1B, MAP1A, MAP4, NDEL1	168	27	19662	17.3386	0.34398	0.0135242	0.0118215
GOTERM_CC_DIRECT	GO:0005913~cell-cell adherens junction	10	5.78035	0.00155674	AFDN, EPB41L1, SERBP1, ARHGAP1, TNKS1BP1, CTNNA2, BAIAP2, CLINT1, MARK2, SPTBN1	168	316	19662	3.70366	0.351512	0.0135242	0.0118215
GOTERM_CC_DIRECT	GO:0015629~actin cytoskeleton	8	4.62428	0.00167996	PPP1R12A, OPHN1, LRRC7, PEAK1, CTNNA2, BAIAP2, SYNPO, PPP1R9B	168	201	19662	4.65814	0.373385	0.0141524	0.0123707
GOTERM_CC_DIRECT	GO:0043204~perikaryon	7	4.04624	0.00179052	CAMK2B, SLC12A5, MAP1B, CACNA1A, SYNPO, CACNA1E, ASTN1	168	150	19662	5.46167	0.392384	0.0146402	0.012797
GOTERM_CC_DIRECT	GO:0032591~dendritic spine membrane	3	1.7341	0.00308571	PALM, ATP2B1, PPP1R9B	168	10	19662	35.1107	0.57648	0.0245094	0.0214237
GOTERM_CC_DIRECT	GO:0031410~cytoplasmic vesicle	14	8.09249	0.0035461	PTPRN2, SLC30A3, CADPS, TRAPPC8, CLINT1, AP3B2, ADD2, CLIP1, NECAP1, SQSTM1, PACSIN1, RAB11FIP5, CDK16, ASTN1	168	646	19662	2.53638	0.627519	0.0273838	0.0239362
GOTERM_CC_DIRECT	GO:0030175~filopodium	5	2.89017	0.00419796	FARP1, LRRC7, PALM, BAIAP2, PPP1R9B	168	77	19662	7.59972	0.689474	0.0315414	0.0275704
GOTERM_CC_DIRECT	GO:0005768~endosome	12	6.93642	0.00689093	NISCH, SLC30A3, MGRN1, MAGI2, BIRC6, AP1AR, TNIK, RAB11FIP2, SQSTM1, PACSIN1, RAB11FIP5, ASTN1	168	544	19662	2.58167	0.853731	0.0504126	0.0440657
GOTERM_CC_DIRECT	GO:0030673~axolemma	3	1.7341	0.0111528	EPB41L3, SLC1A2, SPTBN1	168	19	19662	18.4793	0.95575	0.0794997	0.0694907
GOTERM_CC_DIRECT	GO:0005802~trans-Golgi network	6	3.46821	0.0131321	PCLO, GBF1, BIRC6, BSN, AP3B2, PACSIN1	168	164	19662	4.28179	0.974649	0.0893461	0.0780975
GOTERM_CC_DIRECT	GO:0016529~sarcoplasmic reticulum	4	2.31214	0.0131978	CAMK2B, CAMK2D, ANK3, NOS1	168	58	19662	8.07143	0.975113	0.0893461	0.0780975
GOTERM_CC_DIRECT	GO:0016327~apicolateral plasma membrane	3	1.7341	0.0135454	PALM, RASGRF1, PRICKLE2	168	21	19662	16.7194	0.977435	0.0893461	0.0780975
GOTERM_CC_DIRECT	GO:0030136~clathrin-coated vesicle	4	2.31214	0.0138197	AAK1, CLINT1, SNAP91, ASTN1	168	59	19662	7.93462	0.979114	0.0893461	0.0780975
GOTERM_CC_DIRECT	GO:0005905~clathrin-coated pit	4	2.31214	0.0144581	NECAP1, ITSN1, AAK1, SNAP91	168	60	19662	7.80238	0.982555	0.0913488	0.079848
GOTERM_CC_DIRECT	GO:0098793~presynapse	4	2.31214	0.0164723	CADPS, CACNA1A, BSN, SNAP91	168	63	19662	7.43084	0.990122	0.101762	0.0889503
GOTERM_CC_DIRECT	GO:0048788~cytoskeleton of presynaptic active zone	2	1.15607	0.0169154	PCLO, BSN	168	2	19662	117.036	0.991285	0.102228	0.0893573
GOTERM_CC_DIRECT	GO:0005891~voltage-gated calcium channel complex	3	1.7341	0.0175094	PDE4B, CACNA1A, CACNA1E	168	24	19662	14.6295	0.992633	0.103566	0.0905272
GOTERM_CC_DIRECT	GO:0032590~dendrite membrane	3	1.7341	0.0203913	SLC12A5, PALM, ATP2B1	168	26	19662	13.5041	0.996744	0.1181	0.103231
GOTERM_CC_DIRECT	GO:0043209~myelin sheath	6	3.46821	0.0241759	DPYSL2, PEBP1, TPPP, SYN1, DNM1, PACSIN1	168	192	19662	3.65737	0.99889	0.137161	0.119893
GOTERM_CC_DIRECT	GO:0005794~Golgi apparatus	18	10.4046	0.0248049	SEC16A, GBF1, MINK1, PEBP1, AP1AR, CLINT1, AP3B2, SYN1, ARFGAP1, DNM1, JAKMIP2, SMPD3, PITPNM1, OSBP, BIRC6, PI4KB, CLASP1, RAB11FIP5	168	1190	19662	1.77029	0.999072	0.137915	0.120552
GOTERM_CC_DIRECT	GO:0016323~basolateral plasma membrane	6	3.46821	0.0297565	PALM, RASGRF1, CASK, CTNNA2, ATP2B1, ANK3	168	203	19662	3.45918	0.999775	0.162202	0.141781
GOTERM_CC_DIRECT	GO:0033017~sarcoplasmic reticulum membrane	3	1.7341	0.0318751	CAMK2B, CAMK2D, NOS1	168	33	19662	10.6396	0.999877	0.170409	0.148955
GOTERM_CC_DIRECT	GO:0015630~microtubule cytoskeleton	5	2.89017	0.0459457	CLIP1, NAV1, MAPRE3, MAP4, CDK16	168	158	19662	3.70366	0.999998	0.240998	0.210657
GOTERM_CC_DIRECT	GO:0001726~ruffle	4	2.31214	0.0472578	CLIP1, INPP5J, ARHGAP1, BAIAP2	168	95	19662	4.92782	0.999999	0.24329	0.21266
GOTERM_CC_DIRECT	GO:0045180~basal cortex	2	1.15607	0.0579697	MARK2, CLASP1	168	7	19662	33.4388	1	0.293011	0.256121
GOTERM_CC_DIRECT	GO:0001917~photoreceptor inner segment	3	1.7341	0.060451	NOS1, SHANK2, DNM1	168	47	19662	7.47036	1	0.300096	0.262314
GOTERM_CC_DIRECT	GO:0014704~intercalated disc	3	1.7341	0.0697674	CAMK2D, ANK2, ANK3	168	51	19662	6.88445	1	0.340269	0.297429
GOTERM_CC_DIRECT	GO:0016328~lateral plasma membrane	3	1.7341	0.0770413	PRICKLE2, ANK3, MARK2	168	54	19662	6.50198	1	0.36843	0.322045
GOTERM_CC_DIRECT	GO:0005813~centrosome	8	4.62428	0.0782136	DYNC1LI2, BRSK2, CLIP1, PPP1R12A, PDE4B, CALM1, CLASP1, NDEL1	168	435	19662	2.15238	1	0.36843	0.322045
GOTERM_CC_DIRECT	GO:0005912~adherens junction	3	1.7341	0.0795172	AFDN, CTNNA2, PPP1R9B	168	55	19662	6.38377	1	0.36843	0.322045
GOTERM_CC_DIRECT	GO:0097470~ribbon synapse	2	1.15607	0.0817796	PCLO, BSN	168	10	19662	23.4071	1	0.3727	0.325778
GOTERM_CC_DIRECT	GO:0005881~cytoplasmic microtubule	3	1.7341	0.0845423	BCAS3, CLIP1, CLASP1	168	57	19662	6.15977	1	0.379077	0.331351
GOTERM_CC_DIRECT	GO:0005911~cell-cell junction	5	2.89017	0.0924622	AFDN, EPB41L1, HEPACAM, EPB41L3, CASK	168	201	19662	2.91134	1	0.405749	0.354665
GOTERM_CC_DIRECT	GO:0043198~dendritic shaft	3	1.7341	0.0948693	SLC12A5, INPP5J, SLC1A2	168	61	19662	5.75585	1	0.405749	0.354665
GOTERM_CC_DIRECT	GO:0030672~synaptic vesicle membrane	3	1.7341	0.0948693	PTPRN2, SLC30A3, SYN1	168	61	19662	5.75585	1	0.405749	0.354665

## Sheet: Phospho_GO_MF
Gene ontology - Molecular Function
Category	Term	Count	%	PValue	Genes	List Total	Pop Hits	Pop Total	Fold Enrichment	Bonferroni	Benjamini	FDR
GOTERM_MF_DIRECT	GO:0005515~protein binding	78	45.0867	1.39102e-12	PTPRS, ITSN1, RASGRF1, ARHGAP1, ZDHHC5, RAPH1, GPHN, PPP1R9B, EDC4, RIMS1, PCLO, OPHN1, PSMD2, DPYSL2, RPS6KA2, MCF2L, PDE4B, NOS1, BSN, GIT1, RGS7, NDEL1, PPP1R12A, USP5, EXOC7, MAGI2, CASK, ANK2, ANK3, ARFGAP1, SYN1, DNM1, DYNC1LI2, CLIP1, MAP1B, MAP1A, BIRC6, MAPRE3, TNIK, SQSTM1, ASTN1, CAMK2B, CAMK2D, BRSK2, HEPACAM, PLPPR4, CAMK2A, PRICKLE2, CACNA1A, PRICKLE1, NYAP2, BAG6, EPB41L1, MAP4, SR…	157	4092	17446	2.11814	4.04781e-10	4.04787e-10	3.90877e-10
GOTERM_MF_DIRECT	GO:0008017~microtubule binding	11	6.35838	1.28604e-05	CLIP1, DPYSL2, MAP1B, MAP1A, MAPRE3, TPPP, MAP4, PEX14, CLASP1, DNM1, NDEL1	157	200	17446	6.11166	0.0037354	0.00187118	0.00180688
GOTERM_MF_DIRECT	GO:0019901~protein kinase binding	15	8.67052	3.6099e-05	CAMK2B, BRSK2, PPP1R12A, CADPS, RASGRF1, PEBP1, SYN1, SNAP91, DNM1, RIMS1, SIPA1L1, DPYSL2, RAB11FIP2, PPP1R12C, SQSTM1	157	434	17446	3.84059	0.01045	0.00279725	0.00270112
GOTERM_MF_DIRECT	GO:0005516~calmodulin binding	10	5.78035	3.84501e-05	CAMK2B, CAMK2D, CAMK2A, KCNQ2, CASK, CACNA1A, ATP2B1, NOS1, SPTBN1, ADD2	157	182	17446	6.10555	0.0111268	0.00279725	0.00270112
GOTERM_MF_DIRECT	GO:0044325~ion channel binding	8	4.62428	0.000102084	RIMS1, CAMK2D, PDE4B, ANK2, ANK3, NOS1, CALM1, PPP1R9B	157	120	17446	7.40807	0.029271	0.00594128	0.00573711
GOTERM_MF_DIRECT	GO:0005096~GTPase activator activity	10	5.78035	0.000269157	GIT2, RALGAPB, RABGAP1, SIPA1L1, OPHN1, ARHGAP1, SRGAP3, GIT1, ARFGAP1, RGS7	157	235	17446	4.72855	0.0753455	0.0130541	0.0126055
GOTERM_MF_DIRECT	GO:0008092~cytoskeletal protein binding	6	3.46821	0.000354999	FARP1, EPB41L1, EPB41L3, ANK3, GPHN, PACSIN1	157	68	17446	9.8048	0.0981644	0.0147578	0.0142507
GOTERM_MF_DIRECT	GO:0098641~cadherin binding involved in cell-cell adhesion	10	5.78035	0.000926671	AFDN, EPB41L1, SERBP1, ARHGAP1, TNKS1BP1, CTNNA2, BAIAP2, CLINT1, MARK2, SPTBN1	157	279	17446	3.98283	0.236457	0.0317742	0.0306823
GOTERM_MF_DIRECT	GO:0004672~protein kinase activity	14	8.09249	0.000982709	CAMK2B, CAMK2D, BRSK2, CDKL5, CAMK2A, MINK1, CASK, PPP1R9B, PEAK1, RPS6KA2, AAK1, TNIK, MARK2, CDK16	157	531	17446	2.92974	0.248819	0.0317742	0.0306823
GOTERM_MF_DIRECT	GO:0005543~phospholipid binding	6	3.46821	0.00115637	PITPNM1, OPHN1, MAP1B, SPTBN1, SNAP91, PACSIN1	157	88	17446	7.57643	0.285875	0.0336503	0.0324939
GOTERM_MF_DIRECT	GO:0032403~protein complex binding	11	6.35838	0.00144901	GIT2, SIPA1L1, HSPA4, MAP1B, MAGI2, CASK, GIT1, DNM1, SPTBN1, NDEL1, PPP1R9B	157	358	17446	3.41433	0.344245	0.038333	0.0370157
GOTERM_MF_DIRECT	GO:0004674~protein serine/threonine kinase activity	12	6.93642	0.00164514	CAMK2B, CAMK2D, BRSK2, CDKL5, RPS6KA2, CAMK2A, MINK1, AAK1, CASK, TNIK, MARK2, CDK16	157	428	17446	3.11554	0.380679	0.0398947	0.0385238
GOTERM_MF_DIRECT	GO:0008093~cytoskeletal adaptor activity	3	1.7341	0.00274463	ANK2, ANK3, BAIAP2	157	9	17446	37.0403	0.550575	0.0614376	0.0593263
GOTERM_MF_DIRECT	GO:0016301~kinase activity	14	8.09249	0.0075571	CAMK2B, GIT2, CAMK2D, BRSK2, CDKL5, CAMK2A, MINK1, CASK, PEAK1, RPS6KA2, PI4KB, TNIK, MARK2, CDK16	157	674	17446	2.30815	0.890021	0.15708	0.151682
GOTERM_MF_DIRECT	GO:0008289~lipid binding	8	4.62428	0.0108867	OSBPL6, MCF2L, CADPS, OSBP, PEBP1, CLINT1, MARK2, PACSIN1	157	270	17446	3.29247	0.958638	0.203128	0.196147
GOTERM_MF_DIRECT	GO:0003779~actin binding	9	5.20231	0.0111685	OPHN1, EPB41L1, MAP1B, MAP1A, EPB41L3, SYNPO, SPTBN1, PPP1R9B, ADD2	157	338	17446	2.95884	0.96193	0.203128	0.196147
GOTERM_MF_DIRECT	GO:0004683~calmodulin-dependent protein kinase activity	3	1.7341	0.0149248	CAMK2B, CAMK2D, CAMK2A	157	21	17446	15.8744	0.987423	0.255478	0.246699
GOTERM_MF_DIRECT	GO:0050998~nitric-oxide synthase binding	3	1.7341	0.016322	CAMK2D, CALM1, DNM1	157	22	17446	15.1529	0.991678	0.263872	0.254804
GOTERM_MF_DIRECT	GO:0030674~protein binding, bridging	4	2.31214	0.0172917	AMFR, ANK2, FRMD4A, ANK3	157	61	17446	7.28662	0.993755	0.264836	0.255735
GOTERM_MF_DIRECT	GO:0017124~SH3 domain binding	5	2.89017	0.0215211	RIMS1, DNAJC6, INPP5J, ARHGAP1, SHANK2	157	118	17446	4.70852	0.99822	0.313132	0.302371
GOTERM_MF_DIRECT	GO:0005089~Rho guanyl-nucleotide exchange factor activity	4	2.31214	0.0286504	FARP1, MCF2L, RASGRF1, ITSN1	157	74	17446	6.00654	0.999788	0.384952	0.371723
GOTERM_MF_DIRECT	GO:0030507~spectrin binding	3	1.7341	0.0311843	ANK2, ANK3, ADD2	157	31	17446	10.7536	0.999901	0.384952	0.371723
GOTERM_MF_DIRECT	GO:0005244~voltage-gated ion channel activity	5	2.89017	0.0323198	CACNG8, KCNQ2, CACNA1A, CACNA1E, KCNJ3	157	134	17446	4.14631	0.99993	0.384952	0.371723
GOTERM_MF_DIRECT	GO:0005200~structural constituent of cytoskeleton	4	2.31214	0.032774	EPB41L1, EPB41L3, ANK3, SPTBN1	157	78	17446	5.69851	0.999939	0.384952	0.371723
GOTERM_MF_DIRECT	GO:0004864~protein phosphatase inhibitor activity	3	1.7341	0.0330715	PPP1R1A, ELFN2, PPP1R9B	157	32	17446	10.4176	0.999944	0.384952	0.371723
GOTERM_MF_DIRECT	GO:0008022~protein C-terminus binding	6	3.46821	0.0398241	LRRC7, RASGRF1, CASK, SHANK2, DNM1, PPP1R9B	157	209	17446	3.19008	0.999993	0.445723	0.430406
GOTERM_MF_DIRECT	GO:0005262~calcium channel activity	4	2.31214	0.041895	SLC24A2, CACNG8, CACNA1A, CACNA1E	157	86	17446	5.16842	0.999996	0.451535	0.436019
GOTERM_MF_DIRECT	GO:0048487~beta-tubulin binding	3	1.7341	0.0474535	BCAS3, PEX14, NDEL1	157	39	17446	8.54777	0.999999	0.477181	0.460783
GOTERM_MF_DIRECT	GO:0005524~ATP binding	21	12.1387	0.0481296	CAMK2B, CAMK2D, BRSK2, CDKL5, HSPA4, CAMK2A, MINK1, SARS, CASK, PEBP1, ATP2B1, SYN1, GPHN, DYNC1LI2, PEAK1, RPS6KA2, AAK1, PI4KB, TNIK, MARK2, CDK16	157	1507	17446	1.54847	0.999999	0.477181	0.460783
GOTERM_MF_DIRECT	GO:0048365~Rac GTPase binding	3	1.7341	0.0519129	FARP1, CDKL5, SRGAP3	157	41	17446	8.13081	1	0.477181	0.460783
GOTERM_MF_DIRECT	GO:0046870~cadmium ion binding	2	1.15607	0.0524735	SLC24A2, NOS1	157	6	17446	37.0403	1	0.477181	0.460783
GOTERM_MF_DIRECT	GO:0031749~D2 dopamine receptor binding	2	1.15607	0.0524735	DNM1, PPP1R9B	157	6	17446	37.0403	1	0.477181	0.460783
GOTERM_MF_DIRECT	GO:0005245~voltage-gated calcium channel activity	3	1.7341	0.0541967	CACNG8, CACNA1A, CACNA1E	157	42	17446	7.93722	1	0.477916	0.461493
GOTERM_MF_DIRECT	GO:0032947~protein complex scaffold	3	1.7341	0.0636739	MAGI2, ITSN1, GPHN	157	46	17446	7.24702	1	0.534509	0.516141
GOTERM_MF_DIRECT	GO:0005216~ion channel activity	5	2.89017	0.066094	GABRA1, GABRA4, KCNQ2, CACNA1A, CACNA1E	157	170	17446	3.26827	1	0.534509	0.516141
GOTERM_MF_DIRECT	GO:0015631~tubulin binding	3	1.7341	0.0661248	CLIP1, TPPP, MAP4	157	47	17446	7.09283	1	0.534509	0.516141
GOTERM_MF_DIRECT	GO:0004445~inositol-polyphosphate 5-phosphatase activity	2	1.15607	0.0776749	SEC16A, INPP5J	157	9	17446	24.6936	1	0.610902	0.589909
GOTERM_MF_DIRECT	GO:0030165~PDZ domain binding	4	2.31214	0.0858357	MAGI2, CASK, ATP2B1, BAIAP2	157	116	17446	3.83176	1	0.63688	0.614994
GOTERM_MF_DIRECT	GO:0001222~transcription corepressor binding	2	1.15607	0.0859265	PCLO, BSN	157	10	17446	22.2242	1	0.63688	0.614994
GOTERM_MF_DIRECT	GO:0047485~protein N-terminus binding	4	2.31214	0.0875436	KCNQ2, CALM1, CACNA1E, PEX14	157	117	17446	3.79901	1	0.63688	0.614994
GOTERM_MF_DIRECT	GO:0050321~tau-protein kinase activity	2	1.15607	0.0941047	BRSK2, MARK2	157	11	17446	20.2038	1	0.652011	0.629605
GOTERM_MF_DIRECT	GO:0008331~high voltage-gated calcium channel activity	2	1.15607	0.0941047	CACNA1A, CACNA1E	157	11	17446	20.2038	1	0.652011	0.629605

## Sheet: Phospho_GO_KEGG
KEGG pathways
Category	Term	Count	%	PValue	Genes	List Total	Pop Hits	Pop Total	Fold Enrichment	Bonferroni	Benjamini	FDR
KEGG_PATHWAY	mmu04720:Long-term potentiation	6	3.46821	0.00027415	CAMK2B, CAMK2D, PPP1R1A, RPS6KA2, CAMK2A, CALM1	69	66	7691	10.1331	0.0283792	0.0175455	0.0147048
KEGG_PATHWAY	mmu04921:Oxytocin signaling pathway	8	4.62428	0.0003342	CAMK2B, CACNG8, CAMK2D, PPP1R12A, CAMK2A, CALM1, PPP1R12C, KCNJ3	69	150	7691	5.94473	0.0344881	0.0175455	0.0147048
KEGG_PATHWAY	mmu04020:Calcium signaling pathway	8	4.62428	0.000995456	CAMK2B, CAMK2D, CAMK2A, CACNA1A, ATP2B1, NOS1, CALM1, CACNA1E	69	180	7691	4.95395	0.0992927	0.0262758	0.0220216
KEGG_PATHWAY	mmu04261:Adrenergic signaling in cardiomyocytes	7	4.04624	0.00152326	CAMK2B, CACNG8, CAMK2D, PPP1R1A, CAMK2A, ATP2B1, CALM1	69	142	7691	5.49469	0.147911	0.0262758	0.0220216
KEGG_PATHWAY	mmu04713:Circadian entrainment	6	3.46821	0.00167577	CAMK2B, CAMK2D, CAMK2A, NOS1, CALM1, KCNJ3	69	98	7691	6.82431	0.161468	0.0262758	0.0220216
KEGG_PATHWAY	mmu04024:cAMP signaling pathway	8	4.62428	0.0016808	CAMK2B, AFDN, CAMK2D, PPP1R12A, CAMK2A, PDE4B, ATP2B1, CALM1	69	197	7691	4.52645	0.161912	0.0262758	0.0220216
KEGG_PATHWAY	mmu05205:Proteoglycans in cancer	8	4.62428	0.00199531	CAMK2B, CAMK2D, PPP1R12A, CAMK2A, ANK2, ANK3, PPP1R12C, EIF4B	69	203	7691	4.39266	0.189186	0.0262758	0.0220216
KEGG_PATHWAY	mmu04144:Endocytosis	9	5.20231	0.00200197	GIT2, IQSEC2, DNAJC6, GBF1, RAB11FIP2, GIT1, DNM1, ARFGAP1, RAB11FIP5	69	261	7691	3.84358	0.189754	0.0262758	0.0220216
KEGG_PATHWAY	mmu04725:Cholinergic synapse	6	3.46821	0.00312858	CAMK2B, CAMK2D, CAMK2A, KCNQ2, CACNA1A, KCNJ3	69	113	7691	5.91843	0.280369	0.0365001	0.0305906
KEGG_PATHWAY	mmu04728:Dopaminergic synapse	6	3.46821	0.00645567	CAMK2B, CAMK2D, CAMK2A, CACNA1A, CALM1, KCNJ3	69	134	7691	4.99091	0.493405	0.0677845	0.0568099
KEGG_PATHWAY	mmu05032:Morphine addiction	5	2.89017	0.00904935	GABRA1, GABRA4, PDE4B, CACNA1A, KCNJ3	69	93	7691	5.99268	0.614998	0.0863802	0.0723948
KEGG_PATHWAY	mmu04723:Retrograde endocannabinoid signaling	5	2.89017	0.0128332	RIMS1, GABRA1, GABRA4, CACNA1A, KCNJ3	69	103	7691	5.41086	0.742363	0.11229	0.09411
KEGG_PATHWAY	mmu04114:Oocyte meiosis	5	2.89017	0.0169963	CAMK2B, CAMK2D, RPS6KA2, CAMK2A, CALM1	69	112	7691	4.97606	0.834693	0.137278	0.115052
KEGG_PATHWAY	mmu05214:Glioma	4	2.31214	0.0195487	CAMK2B, CAMK2D, CAMK2A, CALM1	69	65	7691	6.85931	0.874184	0.146615	0.122877
KEGG_PATHWAY	mmu05031:Amphetamine addiction	4	2.31214	0.0211743	CAMK2B, CAMK2D, CAMK2A, CALM1	69	67	7691	6.65455	0.894303	0.147767	0.123842
KEGG_PATHWAY	mmu04722:Neurotrophin signaling pathway	5	2.89017	0.0225168	CAMK2B, CAMK2D, RPS6KA2, CAMK2A, CALM1	69	122	7691	4.56819	0.908488	0.147767	0.123842
KEGG_PATHWAY	mmu04971:Gastric acid secretion	4	2.31214	0.0255548	CAMK2B, CAMK2D, CAMK2A, CALM1	69	72	7691	6.19243	0.934002	0.157838	0.132283
KEGG_PATHWAY	mmu04310:Wnt signaling pathway	5	2.89017	0.0357424	CAMK2B, CAMK2D, CAMK2A, PRICKLE2, PRICKLE1	69	141	7691	3.95262	0.978109	0.203256	0.170348
KEGG_PATHWAY	mmu04911:Insulin secretion	4	2.31214	0.04021	CAMK2B, CAMK2D, PCLO, CAMK2A	69	86	7691	5.18436	0.986557	0.203256	0.170348
KEGG_PATHWAY	mmu04925:Aldosterone synthesis and secretion	4	2.31214	0.04021	CAMK2B, CAMK2D, CAMK2A, CALM1	69	86	7691	5.18436	0.986557	0.203256	0.170348
KEGG_PATHWAY	mmu04727:GABAergic synapse	4	2.31214	0.0413897	GABRA1, GABRA4, CACNA1A, GPHN	69	87	7691	5.12477	0.988185	0.203256	0.170348
KEGG_PATHWAY	mmu04912:GnRH signaling pathway	4	2.31214	0.0425869	CAMK2B, CAMK2D, CAMK2A, CALM1	69	88	7691	5.06653	0.989638	0.203256	0.170348
KEGG_PATHWAY	mmu05033:Nicotine addiction	3	1.7341	0.0484369	GABRA1, GABRA4, CACNA1A	69	40	7691	8.35978	0.994556	0.221125	0.185324
KEGG_PATHWAY	mmu04916:Melanogenesis	4	2.31214	0.0568856	CAMK2B, CAMK2D, CAMK2A, CALM1	69	99	7691	4.50359	0.997866	0.244801	0.205166
KEGG_PATHWAY	mmu04922:Glucagon signaling pathway	4	2.31214	0.0582859	CAMK2B, CAMK2D, CAMK2A, CALM1	69	100	7691	4.45855	0.998174	0.244801	0.205166
KEGG_PATHWAY	mmu04724:Glutamatergic synapse	4	2.31214	0.0811926	SLC1A2, CACNA1A, SHANK2, KCNJ3	69	115	7691	3.877	0.999862	0.327893	0.274806
KEGG_PATHWAY	mmu04150:mTOR signaling pathway	3	1.7341	0.0955924	RPS6KA2, AKT1S1, EIF4B	69	59	7691	5.66765	0.999974	0.371748	0.31156

## Sheet: Phospho_GO_BP+CC+MF clustering
Functional annotation clustering - GO:Biological Process + GO: Cellular Compartment + GO: Molecular Function; Classification Stringency: Medium
Annotation Cluster 1	Enrichment Score: 2.669626937125681
Category	Term	Count	%	PValue	Genes	List Total	Pop Hits	Pop Total	Fold Enrichment	Bonferroni	Benjamini	FDR
GOTERM_MF_DIRECT	GO:0098641~cadherin binding involved in cell-cell adhesion	10	5.78035	0.000926671	AFDN, EPB41L1, SERBP1, ARHGAP1, TNKS1BP1, CTNNA2, BAIAP2, CLINT1, MARK2, SPTBN1	157	279	17446	3.98283	0.235749	0.0317742	0.0306823
GOTERM_CC_DIRECT	GO:0005913~cell-cell adherens junction	10	5.78035	0.00155674	AFDN, EPB41L1, SERBP1, ARHGAP1, TNKS1BP1, CTNNA2, BAIAP2, CLINT1, MARK2, SPTBN1	168	316	19662	3.70366	0.351512	0.0135242	0.0118215
GOTERM_BP_DIRECT	GO:0098609~cell-cell adhesion	7	4.04624	0.00679167	EPB41L1, SERBP1, ARHGAP1, TNKS1BP1, CTNNA2, CLINT1, MARK2	161	189	18082	4.15965	0.997357	0.22726	0.22308
Annotation Cluster 2	Enrichment Score: 2.3504578987819356
Category	Term	Count	%	PValue	Genes	List Total	Pop Hits	Pop Total	Fold Enrichment	Bonferroni	Benjamini	FDR
GOTERM_MF_DIRECT	GO:0044325~ion channel binding	8	4.62428	0.000102084	RIMS1, CAMK2D, PDE4B, ANK2, ANK3, NOS1, CALM1, PPP1R9B	157	120	17446	7.40807	0.0291719	0.00594128	0.00573711
GOTERM_CC_DIRECT	GO:0030018~Z disc	7	4.04624	0.000670809	PPP1R12A, SPHKAP, PDE4B, ANK2, ANK3, NOS1, SYNPO	168	124	19662	6.60685	0.170181	0.0074594	0.00652026
GOTERM_CC_DIRECT	GO:0030315~T-tubule	5	2.89017	0.00139689	CAMK2D, ANK2, ANK3, NOS1, KCNJ3	168	57	19662	10.2663	0.321999	0.0129445	0.0113148
GOTERM_CC_DIRECT	GO:0014704~intercalated disc	3	1.7341	0.0697674	CAMK2D, ANK2, ANK3	168	51	19662	6.88445	1	0.340269	0.297429
GOTERM_CC_DIRECT	GO:0042383~sarcolemma	3	1.7341	0.265058	ANK2, ANK3, NOS1	168	118	19662	2.97548	1	0.74689	0.652857
Annotation Cluster 3	Enrichment Score: 2.0209941394858304
Category	Term	Count	%	PValue	Genes	List Total	Pop Hits	Pop Total	Fold Enrichment	Bonferroni	Benjamini	FDR
GOTERM_BP_DIRECT	GO:0046777~protein autophosphorylation	9	5.20231	0.000227769	CAMK2B, CAMK2D, CDKL5, PEAK1, CAMK2A, MINK1, AAK1, TNIK, MARK2	161	183	18082	5.52347	0.179966	0.075731	0.0743382
GOTERM_MF_DIRECT	GO:0004672~protein kinase activity	14	8.09249	0.000982709	CAMK2B, CAMK2D, BRSK2, CDKL5, CAMK2A, MINK1, CASK, PPP1R9B, PEAK1, RPS6KA2, AAK1, TNIK, MARK2, CDK16	157	531	17446	2.92974	0.24808	0.0317742	0.0306823
GOTERM_MF_DIRECT	GO:0004674~protein serine/threonine kinase activity	12	6.93642	0.00164514	CAMK2B, CAMK2D, BRSK2, CDKL5, RPS6KA2, CAMK2A, MINK1, AAK1, CASK, TNIK, MARK2, CDK16	157	428	17446	3.11554	0.379658	0.0398947	0.0385238
GOTERM_BP_DIRECT	GO:0006468~protein phosphorylation	13	7.51445	0.00523858	CAMK2B, CAMK2D, BRSK2, CDKL5, CAMK2A, MINK1, CASK, PEAK1, RPS6KA2, AAK1, TNIK, MARK2, CDK16	161	576	18082	2.53479	0.989692	0.191572	0.188049
GOTERM_MF_DIRECT	GO:0016301~kinase activity	14	8.09249	0.0075571	CAMK2B, GIT2, CAMK2D, BRSK2, CDKL5, CAMK2A, MINK1, CASK, PEAK1, RPS6KA2, PI4KB, TNIK, MARK2, CDK16	157	674	17446	2.30815	0.889184	0.15708	0.151682
GOTERM_BP_DIRECT	GO:0016310~phosphorylation	13	7.51445	0.00832583	CAMK2B, CAMK2D, BRSK2, CDKL5, CAMK2A, MINK1, CASK, PEAK1, RPS6KA2, PI4KB, TNIK, MARK2, CDK16	161	612	18082	2.38568	0.999312	0.258217	0.253469
GOTERM_BP_DIRECT	GO:0018105~peptidyl-serine phosphorylation	5	2.89017	0.0305615	CAMK2B, CAMK2D, BRSK2, RPS6KA2, CAMK2A	161	133	18082	4.2222	1	0.537559	0.527673
GOTERM_MF_DIRECT	GO:0005524~ATP binding	21	12.1387	0.0481296	CAMK2B, CAMK2D, BRSK2, CDKL5, HSPA4, CAMK2A, MINK1, SARS, CASK, PEBP1, ATP2B1, SYN1, GPHN, DYNC1LI2, PEAK1, RPS6KA2, AAK1, PI4KB, TNIK, MARK2, CDK16	157	1507	17446	1.54847	0.999999	0.477181	0.460783
GOTERM_MF_DIRECT	GO:0000166~nucleotide binding	23	13.2948	0.142382	CAMK2B, CAMK2D, BRSK2, CDKL5, HSPA4, AMFR, CAMK2A, MINK1, SARS, CASK, PEBP1, ATP2B1, GPHN, DNM1, DYNC1LI2, PEAK1, RPS6KA2, SRSF4, PI4KB, TNIK, MARK2, EIF4B, CDK16	157	1936	17446	1.32014	1	0.796793	0.769412
GOTERM_MF_DIRECT	GO:0016740~transferase activity	17	9.82659	0.242603	CAMK2B, ATE1, CAMK2D, BRSK2, CDKL5, CAMK2A, MINK1, ZDHHC5, CASK, GPHN, PEAK1, HECW2, RPS6KA2, PI4KB, TNIK, MARK2, CDK16	157	1472	17446	1.28333	1	0.994332	0.960162
Annotation Cluster 4	Enrichment Score: 1.9763394420380729
Category	Term	Count	%	PValue	Genes	List Total	Pop Hits	Pop Total	Fold Enrichment	Bonferroni	Benjamini	FDR
GOTERM_BP_DIRECT	GO:0006816~calcium ion transport	8	4.62428	0.000261141	CAMK2B, SLC24A2, CACNG8, CAMK2D, CAMK2A, CACNA1A, ATP2B1, CACNA1E	161	141	18082	6.37223	0.203465	0.075731	0.0743382
GOTERM_MF_DIRECT	GO:0004683~calmodulin-dependent protein kinase activity	3	1.7341	0.0149248	CAMK2B, CAMK2D, CAMK2A	157	21	17446	15.8744	0.987232	0.255478	0.246699
GOTERM_BP_DIRECT	GO:0018105~peptidyl-serine phosphorylation	5	2.89017	0.0305615	CAMK2B, CAMK2D, BRSK2, RPS6KA2, CAMK2A	161	133	18082	4.2222	1	0.537559	0.527673
GOTERM_BP_DIRECT	GO:0000082~G1/S transition of mitotic cell cycle	3	1.7341	0.104396	CAMK2B, CAMK2D, CAMK2A	161	62	18082	5.43438	1	1	0.982739
Annotation Cluster 5	Enrichment Score: 1.6202966903733889
Category	Term	Count	%	PValue	Genes	List Total	Pop Hits	Pop Total	Fold Enrichment	Bonferroni	Benjamini	FDR
GOTERM_BP_DIRECT	GO:0019226~transmission of nerve impulse	4	2.31214	0.000925341	CACNG8, KCNQ2, CACNA1A, CACNA1E	161	22	18082	20.4201	0.553513	0.0894496	0.0878046
GOTERM_BP_DIRECT	GO:0006811~ion transport	13	7.51445	0.00582933	GABRA1, SLC12A5, SLC30A3, SLC6A15, GABRA4, CACNA1A, ATP2B1, SLC4A3, CACNA1E, ADD2, CACNG8, KCNQ2, KCNJ3	161	584	18082	2.50006	0.993856	0.202861	0.19913
GOTERM_BP_DIRECT	GO:0070588~calcium ion transmembrane transport	5	2.89017	0.00774345	SLC24A2, CACNG8, CACNA1A, ATP2B1, CACNA1E	161	88	18082	6.38128	0.998853	0.249511	0.244922
GOTERM_BP_DIRECT	GO:0034765~regulation of ion transmembrane transport	5	2.89017	0.032033	CACNG8, KCNQ2, CACNA1A, CACNA1E, KCNJ3	161	135	18082	4.15965	1	0.546446	0.536396
GOTERM_MF_DIRECT	GO:0005244~voltage-gated ion channel activity	5	2.89017	0.0323198	CACNG8, KCNQ2, CACNA1A, CACNA1E, KCNJ3	157	134	17446	4.14631	0.999927	0.384952	0.371723
GOTERM_MF_DIRECT	GO:0005262~calcium channel activity	4	2.31214	0.041895	SLC24A2, CACNG8, CACNA1A, CACNA1E	157	86	17446	5.16842	0.999996	0.451535	0.436019
GOTERM_MF_DIRECT	GO:0005245~voltage-gated calcium channel activity	3	1.7341	0.0541967	CACNG8, CACNA1A, CACNA1E	157	42	17446	7.93722	1	0.477916	0.461493
GOTERM_MF_DIRECT	GO:0005216~ion channel activity	5	2.89017	0.066094	GABRA1, GABRA4, KCNQ2, CACNA1A, CACNA1E	157	170	17446	3.26827	1	0.534509	0.516141
GOTERM_BP_DIRECT	GO:0055085~transmembrane transport	5	2.89017	0.40282	SLC12A5, SLC30A3, KCNQ2, CACNA1A, CACNA1E	161	364	18082	1.54273	1	1	0.982739
Annotation Cluster 6	Enrichment Score: 1.2803466602726328
Category	Term	Count	%	PValue	Genes	List Total	Pop Hits	Pop Total	Fold Enrichment	Bonferroni	Benjamini	FDR
GOTERM_MF_DIRECT	GO:0005089~Rho guanyl-nucleotide exchange factor activity	4	2.31214	0.0286504	FARP1, MCF2L, RASGRF1, ITSN1	157	74	17446	6.00654	0.999782	0.384952	0.371723
GOTERM_BP_DIRECT	GO:0035023~regulation of Rho protein signal transduction	4	2.31214	0.0308942	FARP1, MCF2L, RASGRF1, ITSN1	161	77	18082	5.83431	1	0.537559	0.527673
GOTERM_MF_DIRECT	GO:0005085~guanyl-nucleotide exchange factor activity	4	2.31214	0.162912	FARP1, MCF2L, RASGRF1, ITSN1	157	156	17446	2.84926	1	0.839881	0.811019
Annotation Cluster 7	Enrichment Score: 0.4490920258771519
Category	Term	Count	%	PValue	Genes	List Total	Pop Hits	Pop Total	Fold Enrichment	Bonferroni	Benjamini	FDR
GOTERM_BP_DIRECT	GO:0007067~mitotic nuclear division	5	2.89017	0.230574	BRSK2, PPP1R12A, BIRC6, MAPRE3, CLASP1	161	277	18082	2.02727	1	1	0.982739
GOTERM_BP_DIRECT	GO:0051301~cell division	5	2.89017	0.422726	BRSK2, BIRC6, MAPRE3, MAP4, CLASP1	161	374	18082	1.50148	1	1	0.982739
GOTERM_BP_DIRECT	GO:0007049~cell cycle	7	4.04624	0.461164	SMPD3, BRSK2, RABGAP1, HEPACAM, BIRC6, MAPRE3, CLASP1	161	614	18082	1.28041	1	1	0.982739
